# Supplementary material for: Fabrication of SERS-active conjugated copolymers/gold nanoparticles composite films by interface-directed assembly
Source: Royal Society of Chemistry journal article supplement (doi:10.1039/c5ra05430c), 2015-01-01
Supplement: c5ra05430c1.pdf [file c5ra05430c1.pdf]

Electronic Supplementary Material (ESI)

## **Fabrication of SERS-Active Conjugated Copolymers/Gold Nanoparticles Composite Films by Interface-Directed Assembly**

**Ya-Guang He, Sheng-Yu Shi, Na Liu, Yuan-Yuan Zhu, Yun-Sheng Ding, Jun Yin,\* and Zong-Quan Wu\***

*Key Laboratory of Advanced Functional Materials and Devices, Anhui Province, Department of Polymer Material and Engineering, School of Chemistry and Chemical Engineering, Hefei University of Technology, Hefei 230009, China.*

\*Corresponding Author: yinjun@hfut.edu.cn, zqw@hfut.edu.cn.

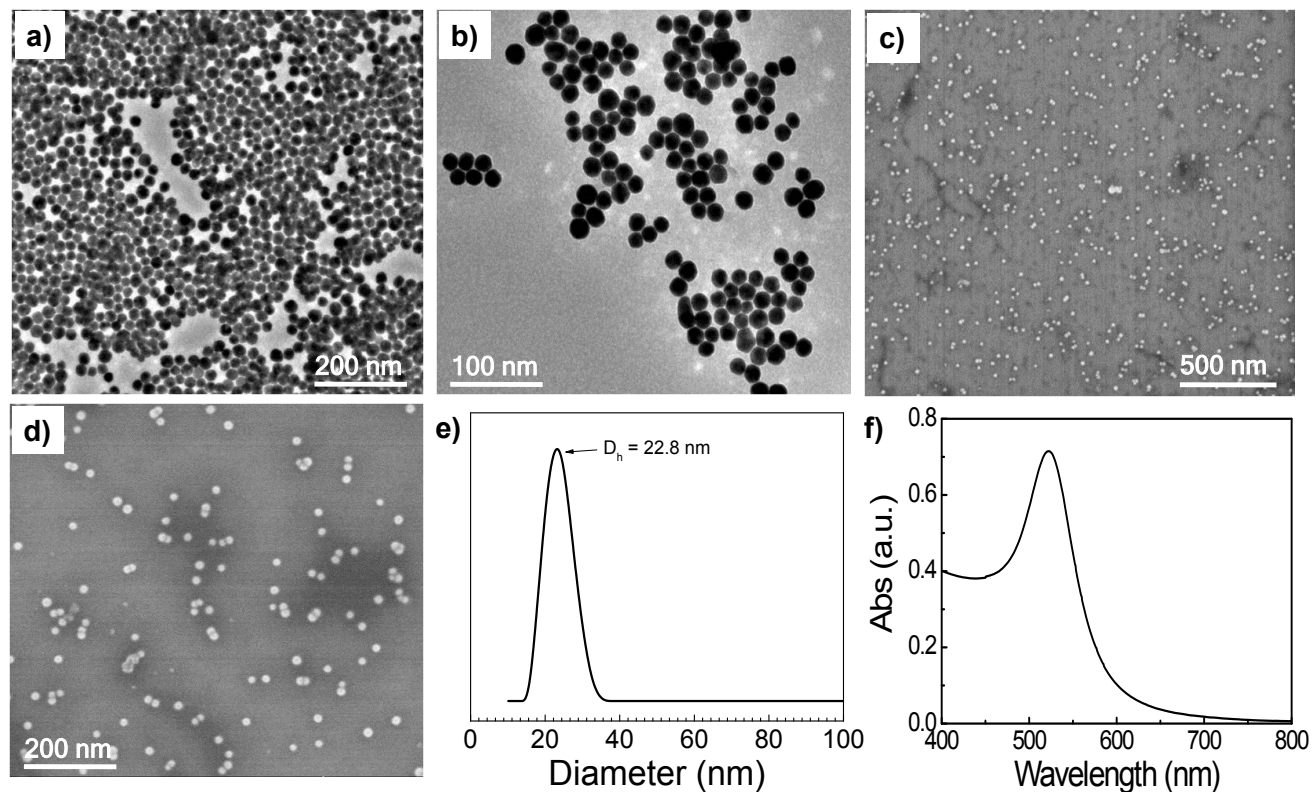

**Figure S1.** (a, b) TEM images, (c, d) SEM images, (e) hydrodynamic diameter distribution and (f) UV-vis spectrum recorded for Au NPs prepared by citrate reduction of  $\text{HAuCl}_4$  in aqueous solutions.

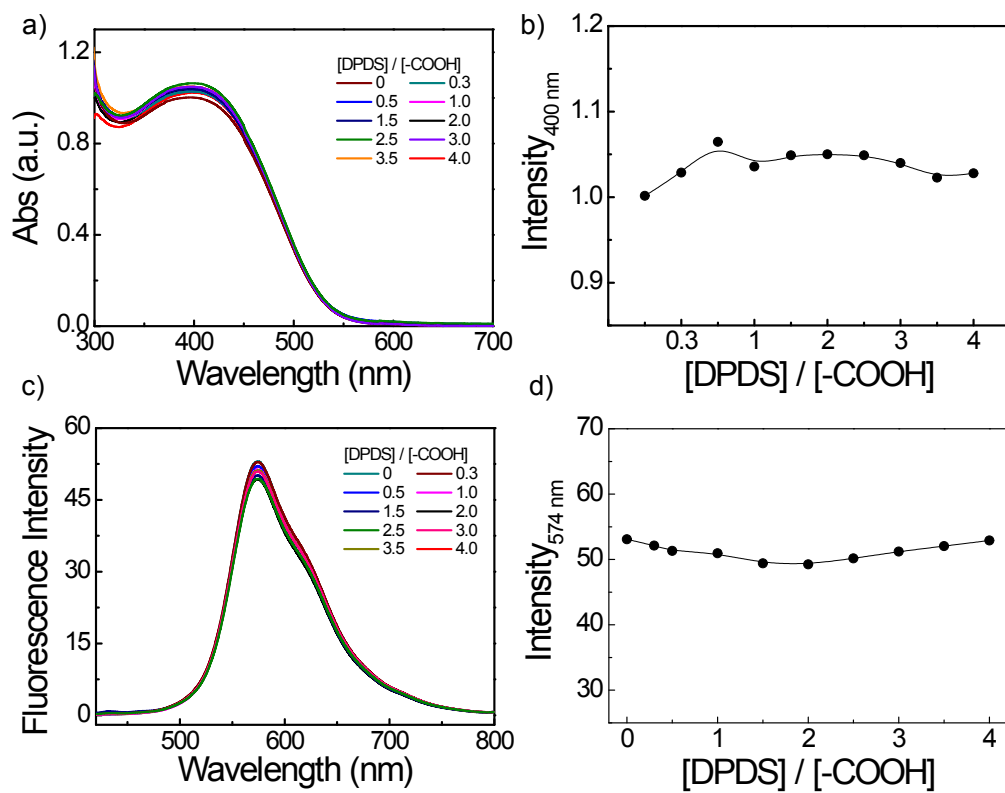

**Figure S2.** (a) Absorption, (c) emission spectra and change in relative (b) UV-vis and (d) PL intensity obtained for PPI(-AA)-*b*-P3HT copolymers before and after cross-linking by DPDS in chloroform as a function of [DPDS]/[-COOH].

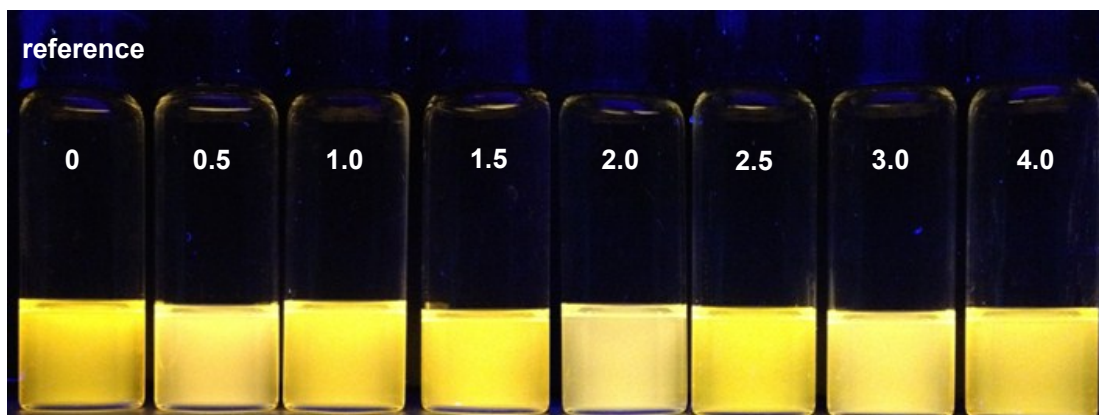

**Figure S3.** Distinct photographs recorded for PPI(-AA)-*b*-P3HT copolymers before and after cross-linking by DPDS in chloroform as a function of [DPDS]/[-COOH] under 365 nm UV light irradiation.

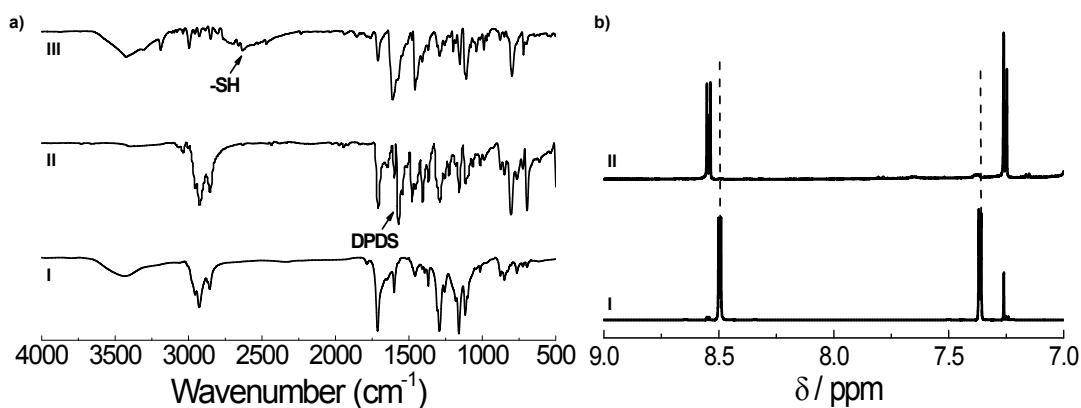

**Figure S4.** (a) FT-IR spectra obtained for (I) PPI(-AA)-*b*-P3HT copolymers, (II) PPI(-AA)-*b*-P3HT/DPDS complex, and (III) PPI(-SH)-*b*-P3HT copolymers. (b)  $^1\text{H}$  NMR spectra obtained for (I) DPDS and (II) PPI(-SH)-*b*-P3HT copolymers.
